# Supplementary material for: Clinicopathologic features and prognostic value of epidermal growth factor receptor mutation in patients with pT1a and pT1b invasive lung adenocarcinoma after surgical resection
Source: PubMed Central journal article supplement — J Thorac Dis. 2021 Sep;13(9):5496–507. doi: 10.21037/jtd-21-924 (PMC8482337; doi:10.21037/jtd-21-924), 2021-09
Supplement: jtd-13-09-5496-supplementary.pdf [file jtd-13-09-5496-supplementary.pdf]

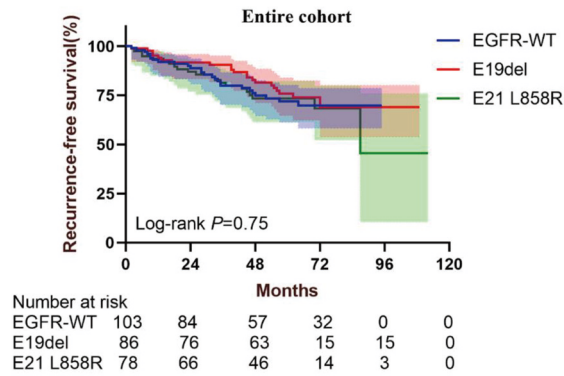

**Figure S1** EGFR mutation types could not predict the recurrence-free survival in patients with pT1a and pT1b invasive lung adenocarcinoma after excluding LPA and puro GGO. EGFR, epidermal growth factor receptor; LPA, lepidic pattern-predominant adenocarcinoma; GGO, pure ground-glass opacity.

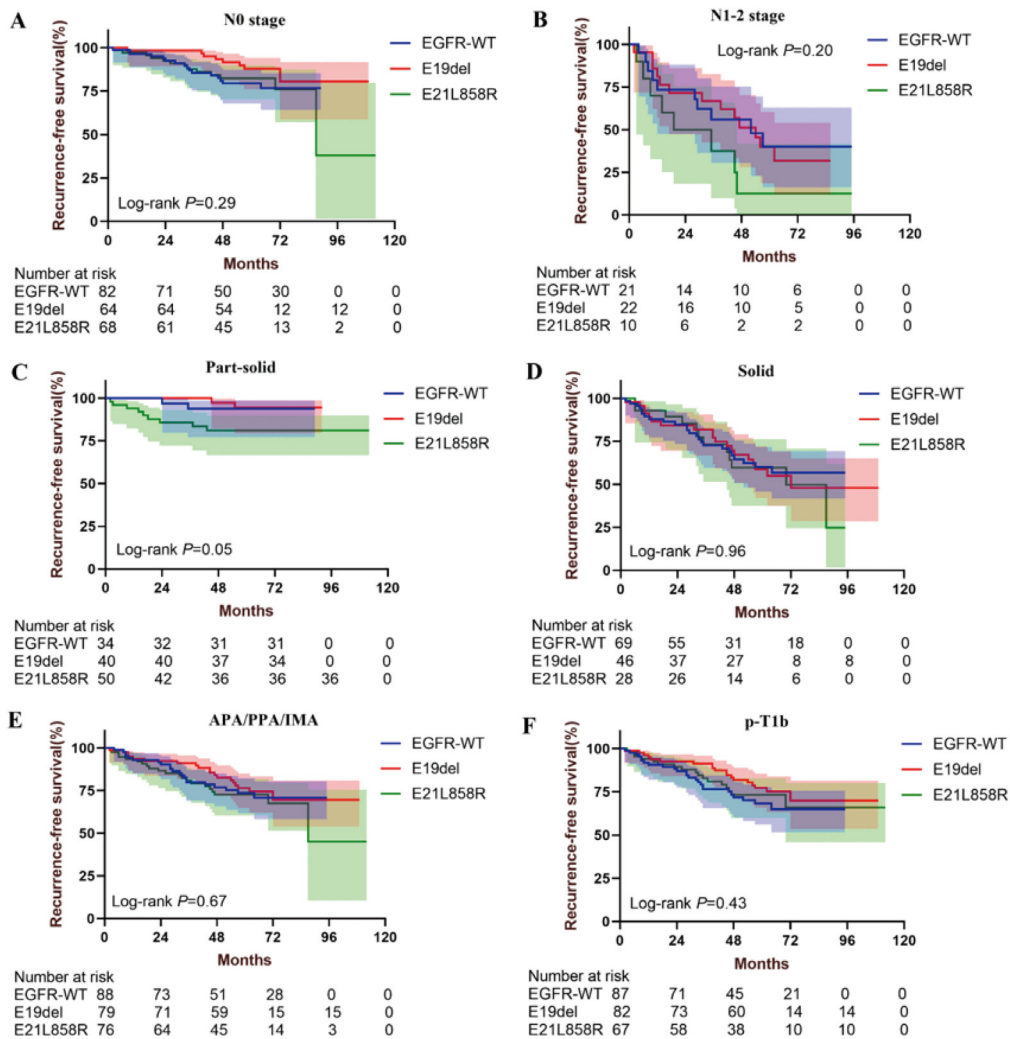

**Figure S2** EGFR mutation types could not predict the recurrence-free survival in patients with different subgroups of pT1a and pT1b invasive lung adenocarcinoma after excluding LPA and puro GGO. EGFR, epidermal growth factor receptor; LPA, lepidic pattern-predominant adenocarcinoma; GGO, pure ground-glass opacity.
